# Supplementary material for: Whole Genome Sequencing Provides Information on the Genomic Architecture and Diversity of Cultivated Gilthead Seabream (Sparus aurata) Broodstock Nuclei
Source: MDPI journal article supplement (doi:10.3390/genes14040839), 2023-03-30
Supplement: s1 [file s1]

# Whole Genome Sequencing Provides Information on the Genomic Architecture and Diversity of Cultivated Gilthead Seabream (*Sparus aurata*) Broodstock Nuclei

Francesca Bertolini <sup>1,\*</sup>, Anisa Ribani <sup>1</sup>, Fabrizio Capoccioni <sup>2</sup>, Luca Buttazzoni <sup>2</sup>, Samuele Bovo <sup>1</sup>, Giuseppina Schiavo <sup>1</sup>, Massimo Caggiano <sup>3</sup>, Max F. Rothschild <sup>4</sup> and Luca Fontanesi <sup>1</sup>

<sup>1</sup> Department of Agricultural and Food Sciences, Division of Animal Sciences, University of Bologna, Viale G. Fanin 46, 40127 Bologna, Italy; AR: anisa.ribani2@unibo.it; SB: Samuele.bovo@unibo.it; GS: Giuseppina.schiavo2@unibo.it; LF: luca.fontanesi@unibo.it

<sup>2</sup> Centro di ricerca “Zootecnia e Acquacoltura”, Consiglio per la ricerca in agricoltura e l’analisi dell’economia agraria (CREA), 00198, Roma, Italy; FC: fabrizio.capoccioni@crea.gov.it; LB: luca.buttazzoni@crea.gov.it

<sup>3</sup> Panittica Italia Società Agricola Srl, 72016 Torre Canne di Fasano, Brindisi, Italy; maxcage29@gmail.com

<sup>4</sup> Department of Animal Science, Iowa State University, Ames, IA, 50011-3150, USA; mfrothsc@iastate.edu

\* Correspondence: francesca.bertolini3@unibo.it

Table S1: Populations retrieved from [7] included in this study, overall number of high-quality reads utilized for the alignment and depth of sequencing considering the alignment to the gilthead seabream reference genome

| Type of populations | Origin   |           |                               |           |
|---------------------|----------|-----------|-------------------------------|-----------|
|                     | Country  | N.animals | N. filtered and aligned reads | Depth (x) |
| Farmed              | Croatia  | 50        | 691,360,480                   | 120.34    |
|                     | Egypt    | 15        | 86,376,622                    | 15.55     |
|                     | France   | 50        | 598,335,029                   | 107.74    |
|                     | Greece 1 | 14        | 338,692,290                   | 60.99     |
|                     | Greece 2 | 13        | 309,693,828                   | 55.77     |
|                     | Greece 3 | 50        | 397,352,329                   | 71.55     |
|                     | Greece 4 | 50        | 428,129,407                   | 77.09     |
|                     | Greece 5 | 50        | 730,947,060                   | 131.62    |
|                     | Italy    | 50        | 329,332,200                   | 59.30     |
|                     | Israel   | 50        | 741,922,099                   | 133.60    |
|                     | Spain 1  | 50        | 642,865,590                   | 115.76    |
|                     | Spain 2  | 50        | 477,303,303                   | 85.95     |
| Wild                | France   | 50        | 331,559,467                   | 59.70     |
|                     | Greece 1 | 50        | 393,380,659                   | 70.84     |
|                     | Greece 2 | 50        | 701,111,813                   | 126.25    |
|                     | Greece 3 | 50        | 592,892,137                   | 106.76    |
|                     | Greece 4 | 50        | 530,484,696                   | 95.53     |
|                     | Italy 1  | 50        | 650,086,955                   | 117.06    |
|                     | Italy 2  | 50        | 660,623,933                   | 118.96    |
|                     | Spain 1  | 50        | 688,175,668                   | 123.92    |
|                     | Spain2   | 50        | 696,493,010                   | 125.42    |
|                     | Spain 3  | 50        | 657,449,993                   | 118.39    |
|                     | Spain 5  | 50        | 670,932,580                   | 120.82    |
|                     | Tunisia  | 50        | 574,318,698                   | 103.42    |

Table S2: Global  $F_{ST}$  of the five pools under investigation against the single pools that composed the wild and farmed pools

|        |          | A1    | A2    | A3    | B     | C     |
|--------|----------|-------|-------|-------|-------|-------|
| Farmed | Croatia  | 0.058 | 0.044 | 0.045 | 0.173 | 0.169 |
|        | Egypt    | 0.096 | 0.095 | 0.097 | 0.197 | 0.193 |
|        | France   | 0.060 | 0.041 | 0.043 | 0.178 | 0.170 |
|        | Greece 1 | 0.078 | 0.059 | 0.061 | 0.189 | 0.190 |
|        | Greece 2 | 0.078 | 0.063 | 0.065 | 0.193 | 0.192 |
|        | Greece 3 | 0.078 | 0.064 | 0.065 | 0.188 | 0.186 |
|        | Greece 4 | 0.089 | 0.074 | 0.076 | 0.198 | 0.198 |
|        | Greece 5 | 0.087 | 0.073 | 0.074 | 0.198 | 0.196 |
|        | Italy    | 0.056 | 0.041 | 0.038 | 0.181 | 0.176 |
|        | Israel   | 0.093 | 0.078 | 0.079 | 0.201 | 0.200 |
|        | Spain 1  | 0.079 | 0.065 | 0.067 | 0.190 | 0.187 |
|        | Spain 2  | 0.074 | 0.059 | 0.061 | 0.185 | 0.175 |
| Wild   | France   | 0.079 | 0.064 | 0.066 | 0.187 | 0.186 |
|        | Greece 1 | 0.071 | 0.057 | 0.058 | 0.177 | 0.176 |
|        | Greece 2 | 0.071 | 0.056 | 0.058 | 0.174 | 0.172 |
|        | Greece 3 | 0.069 | 0.055 | 0.056 | 0.173 | 0.172 |
|        | Greece 4 | 0.070 | 0.056 | 0.057 | 0.175 | 0.174 |
|        | Italy 1  | 0.068 | 0.053 | 0.055 | 0.172 | 0.170 |
|        | Italy 2  | 0.069 | 0.054 | 0.056 | 0.172 | 0.171 |
|        | Spain 1  | 0.071 | 0.057 | 0.058 | 0.176 | 0.183 |
|        | Spain2   | 0.070 | 0.055 | 0.058 | 0.176 | 0.174 |
|        | Spain 3  | 0.070 | 0.055 | 0.057 | 0.175 | 0.171 |
|        | Spain 5  | 0.068 | 0.053 | 0.055 | 0.172 | 0.182 |
|        | Tunisia  | 0.076 | 0.061 | 0.063 | 0.183 | 0.171 |

Table S3:  $F_{ST}$  regions of high divergence in the comparison between nuclei A and B. Reported data includes: chromosome, beginning of the region (start), end of the region (end), size of the region (size) and genes contained in the regions (genes).

| chr | start      | end        | size (Mb) | genes                                                                                                                                                                                                                                                                                                                                                                                                                                                                                                                                                                                                                                                                                                                                                                                                                                                                                                                                                                                                                                                                                                                                                                                                                                                                                                                                                                                                                                                                                                                                                                                                                                                                          |
|-----|------------|------------|-----------|--------------------------------------------------------------------------------------------------------------------------------------------------------------------------------------------------------------------------------------------------------------------------------------------------------------------------------------------------------------------------------------------------------------------------------------------------------------------------------------------------------------------------------------------------------------------------------------------------------------------------------------------------------------------------------------------------------------------------------------------------------------------------------------------------------------------------------------------------------------------------------------------------------------------------------------------------------------------------------------------------------------------------------------------------------------------------------------------------------------------------------------------------------------------------------------------------------------------------------------------------------------------------------------------------------------------------------------------------------------------------------------------------------------------------------------------------------------------------------------------------------------------------------------------------------------------------------------------------------------------------------------------------------------------------------|
| 6   | 12,250,000 | 12,750,000 | 0.5       | apcdd1l;asic1;bcdin3d;cers5;gpd1;LOC115582545;LOC115582924;LOC115582925;LOC115583137;LOC115583139;LOC115583141;LOC115583504;LOC115583733;LOC115583885;LOC115583932;LOC115583933;LOC115583934;LOC115583935;LOC115583936;LOC115584029;LOC115584031;manbal;ncoa5;ppp4r1;rab22a;smarcd1;src;trnat-ugu                                                                                                                                                                                                                                                                                                                                                                                                                                                                                                                                                                                                                                                                                                                                                                                                                                                                                                                                                                                                                                                                                                                                                                                                                                                                                                                                                                              |
| 6   | 14,750,000 | 15,750,000 | 1         | alas1;amhr2;arhgap9;b9d2;c6h12orf10;col2a1;dctn2;ddit3;gli1;iars1;igsf8;itga7;kif5a;LOC115582574;LOC115582595;LOC115582596;LOC115582791;LOC115582956;LOC115582957;LOC115583161;LOC115583164;LOC115583209;LOC115583459;LOC115583461;LOC115583463;LOC115583495;LOC115583666;LOC115584128;LOC115584129;LOC115584148;mars1;ncap1;npff;pde1b;poc1a;ppp1r1a;r3hdm2;rpl29;sp1;sp7;tarbp2;tespa1                                                                                                                                                                                                                                                                                                                                                                                                                                                                                                                                                                                                                                                                                                                                                                                                                                                                                                                                                                                                                                                                                                                                                                                                                                                                                       |
| 6   | 17,500,000 | 18,750,000 | 1.25      | abhd14b;brk1;c6h3orf18;c6h3orf67;cacna2d2;cplane2;edem1;h6pd;LOC115582615;LOC115582616;LOC115582618;LOC115582676;LOC115582677;LOC115582762;LOC115582782;LOC115582783;LOC115582810;LOC115582823;LOC115582824;LOC115582844;LOC115582880;LOC115582896;LOC115582992;LOC115583210;LOC115583408;LOC115583409;LOC115583426;LOC115583427;LOC115583428;LOC115583434;LOC115583464;LOC115583471;LOC115583472;LOC115583473;LOC115583474;LOC115583681;LOC115583682;LOC115583684;LOC115583685;LOC115583686;LOC115583723;LOC115583739;LOC115583775;LOC115583776;LOC115583777;LOC115583780;LOC115583849;LOC115583850;LOC115583940;LOC115583941;LOC115583942;LOC115583943;LOC115584108;mst1;rbm5;rrp9;stau1                                                                                                                                                                                                                                                                                                                                                                                                                                                                                                                                                                                                                                                                                                                                                                                                                                                                                                                                                                                     |
| 6   | 20,500,000 | 23,500,000 | 3         | adipor1;apof;atf1;b4galnt1;cav3;ccdc174;cdk2;cdk4;col7a1;crbn;cse1l;ctsx;eef1akmt3;eefsec;emc3;endou;erbb3;espl1;fancd2;fkbp11;gata2;grm2;ikzf4;irf6;LOC115582523;LOC115582563;LOC115582567;LOC115582585;LOC115582587;LOC115582590;LOC115582619;LOC115582620;LOC115582641;LOC115582679;LOC115582680;LOC115582700;LOC115582702;LOC115582710;LOC115582717;LOC115582744;LOC115582750;LOC115582812;LOC115582843;LOC115582887;LOC115582894;LOC115582907;LOC115582908;LOC115582909;LOC115582910;LOC115582911;LOC115582912;LOC115582913;LOC115582914;LOC115582987;LOC115582988;LOC115582989;slc4a8;LOC115583050;LOC115583060;LOC115583074;LOC115583075;LOC115583080;LOC115583082;LOC115583083;LOC115583104;LOC115583125;LOC115583127;LOC115583128;LOC115583129;LOC115583153;LOC115583155;LOC115583156;LOC115583204;LOC115583205;LOC115583342;LOC115583357;LOC115583358;LOC115583361;LOC115583363;LOC115583365;LOC115583376;LOC115583378;LOC115583380;LOC115583385;LOC115583387;LOC115583412;LOC115583413;LOC115583429;LOC115583432;LOC115583452;LOC115583453;LOC115583468;LOC115583469;LOC115583470;LOC115583486;LOC115583618;ankrd52;esyt1b;LOC115583651;LOC115583652;LOC115583662;LOC115583664;LOC115583673;LOC115583703;LOC115583708;LOC115583719;LOC115583732;LOC115583745;LOC115583760;LOC115583761;LOC115583782;LOC115583861;LOC115583862;LOC115583863;LOC115583864;LOC115583865;LOC115583867;LOC115583893;LOC115583897;LOC115583899;LOC115583902;LOC115583905;LOC115583919;LOC115583923;LOC115583945;LOC115583946;LOC115583947;LOC115583994;LOC115584026;LOC115584052;LOC115584054;LOC115584058;LOC115584059;LOC115584065;LOC115584070;LOC115584071;LOC115584081;LOC115584120; |

|   |            |            |      |                                                                                                                                                                                                                                                                                                                                                                                                                                                                                                                                                                                                                                                                                                                                                                                                                                                                                                                                                                                                                                                                                                                                                                                                                                                                                                                                                                                                                                                                                                                                                                                                                                                                                                                                                                                                                                                                   |
|---|------------|------------|------|-------------------------------------------------------------------------------------------------------------------------------------------------------------------------------------------------------------------------------------------------------------------------------------------------------------------------------------------------------------------------------------------------------------------------------------------------------------------------------------------------------------------------------------------------------------------------------------------------------------------------------------------------------------------------------------------------------------------------------------------------------------------------------------------------------------------------------------------------------------------------------------------------------------------------------------------------------------------------------------------------------------------------------------------------------------------------------------------------------------------------------------------------------------------------------------------------------------------------------------------------------------------------------------------------------------------------------------------------------------------------------------------------------------------------------------------------------------------------------------------------------------------------------------------------------------------------------------------------------------------------------------------------------------------------------------------------------------------------------------------------------------------------------------------------------------------------------------------------------------------|
|   |            |            |      | LOC115584133;LOC115584143;LOC115584152;mcrs1;mettl1;mmp19;nelfcd;npepl1;olfml3;os9;oxtr;pa2g4;parp3;pfdn5;prkag1;prkcd;prph;rabif;rad18;rft1;rps26;ruvbl1;smarcc2;smug1;srgap3;strip1;stx16;sumf1;suox;tatdn2;tex264;thumpd3;timeless;trnaf-gaa;tsfm;uroc1;usp4;vhl;wdr77;zc3h10                                                                                                                                                                                                                                                                                                                                                                                                                                                                                                                                                                                                                                                                                                                                                                                                                                                                                                                                                                                                                                                                                                                                                                                                                                                                                                                                                                                                                                                                                                                                                                                  |
| 6 | 26,250,000 | 30,500,000 | 4.25 | adamts9;aggf1;atxn7;camkv;cast;celf4;cidec;comt;cxc1;dcaf12;dnah1;dnai1;drd5;ell2;eogt;glrx;gnl3l;hmces;id1;idh3b;kbtbd8;kiaa1328;LOC115582512;LOC115582532;LOC115582538;LOC115582569;LOC115582571;LOC115582572;LOC115582573;LOC115582579;LOC115582586;LOC115582601;LOC115582657;LOC115582658;LOC115582660;LOC115582667;LOC115582766;LOC115582767;LOC115582770;LOC115582828;LOC115582873;LOC115582882;LOC115582884;LOC115582918;LOC115582946;LOC115582949;myh7ba;LOC115583067;LOC115583070;LOC115583071;LOC115583077;LOC115583079;LOC115583117;LOC115583118;LOC115583119;LOC115583120;LOC115583122;LOC115583147;LOC115583167;LOC115583168;LOC115583176;LOC115583179;LOC115583180;LOC115583201;LOC115583329;LOC115583349;LOC115583354;LOC115583399;LOC115583400;LOC115583401;LOC115583402;LOC115583403;LOC115583411;LOC115583490;LOC115583492;LOC115583501;LOC115583502;LOC115583507;LOC115583550;LOC115583553;LOC115583562;LOC115583580;LOC115583593;LOC115583594;LOC115583610;LOC115583611;LOC115583613;LOC115583646;LOC115583647;LOC115583648;LOC115583689;LOC115583699;LOC115583701;LOC115583755;LOC115583767;LOC115583793;cdh4;LOC115583846;LOC115583851;LOC115583855;LOC115583879;LOC115583909;LOC115583910;LOC115583921;LOC115583925;LOC115583926;LOC115583927;LOC115583939;LOC115583992;dkey-202e22.2;LOC115584036;LOC115584049;LOC115584097;LOC115584098;LOC115584107;LOC115584109;LOC115584130;LOC115584145;LOC115584150;LOC115584151;LOC115584156;LOC115584191;LOC115584192;LOC115584196;lrig1;lyar;magl1;mon1a;mst1r;mustn1;myorg;ndrg3;nop56;nsg1;nudt2;otop1;pcsk1;prickle2;psmd6;ptpra;pxn;r3hcc1;rae1;rfsd;rho;btb3;rplp0;rpn1;sfbmt1;sla2;slc25a26;slc2a9;stx18;suc1g2;sulf2;synpr;tada3;tfe3;thoc7;tmem128;tmem233;tmf1;tpgs2;traip;trnae-cuc;trnaf-gaa;trnaq-cug;trnaq-uug;trnar-acg;trpc4apa;ubap1;ubap2;cxc1b;ube2r2;wdr1;grm6b;zbtd49;ndrg3a |
| 6 | 34,500,000 | 35,250,000 | 0.75 | barx1;cass4;cstf1;fam120a;LOC115583818;LOC115583819;fbln2;LOC115583825;LOC115583828;LOC115583830;LOC115583833;LOC115583834;LOC115583837;pdrg1;phf2;ptpdc1                                                                                                                                                                                                                                                                                                                                                                                                                                                                                                                                                                                                                                                                                                                                                                                                                                                                                                                                                                                                                                                                                                                                                                                                                                                                                                                                                                                                                                                                                                                                                                                                                                                                                                         |
| 6 | 37,250,000 | 37,750,000 | 0.5  | helz2;LOC115582790;LOC115582792;LOC115582892;aldh1l1;LOC115583158;LOC115583211;LOC115583390;LOC115583769;LOC115583953;LOC115584023;plekha6;                                                                                                                                                                                                                                                                                                                                                                                                                                                                                                                                                                                                                                                                                                                                                                                                                                                                                                                                                                                                                                                                                                                                                                                                                                                                                                                                                                                                                                                                                                                                                                                                                                                                                                                       |

|    |            |            |      |                                                                                                                                                                                                                                                                                                                             |
|----|------------|------------|------|-----------------------------------------------------------------------------------------------------------------------------------------------------------------------------------------------------------------------------------------------------------------------------------------------------------------------------|
| 17 | 4,500,000  | 5,250,000  | 0.75 | cnot10;hace1;kpna5;LOC115567168;LOC115567171;LOC115567172;LOC115567173;LOC115567458;LOC115567467;LOC115567468;LOC115567470;LOC115567472;LOC115567473;LOC115567474;LOC115567479;LOC115567481;LOC115567485;LOC115567486;LOC115567487;LOC115567488;LOC115567489;LOC115567686;LOC115567687;LOC115567688;LOC115567842;rwdd1;zup1 |
| 18 | 15,250,000 | 16,000,000 | 0.75 | fmr1;hdac3;LOC115568236;LOC115568441;LOC115568557;LOC115568808;LOC115568894;LOC115568898;rab33a                                                                                                                                                                                                                             |
| 18 | 31,500,000 | 32,250,000 | 0.75 | btik;enox2;gla;LOC115568228;LOC115568375;LOC115568503;LOC115568505;LOC115568506;LOC115568934;slc4a11;LOC115568979;LOC115568980;mars2;med12;rpl36a;sfxn5;smyd5;timmm8a                                                                                                                                                       |
| 19 | 1,750,000  | 2,500,000  | 0.75 | LOC115569643;LOC115569644;LOC115569645;LOC115569646;LOC115569647;LOC115569714;LOC115570178;LOC115570179;LOC115570180;LOC115570449;LOC115570451                                                                                                                                                                              |
| 22 | 12,500,000 | 13,250,000 | 0.75 | abracl;arhgap11b;aven;clu;garem2;grem1;hadhb;heca;kn11;LOC115573825;LOC115573830;LOC115573881;LOC115573992;LOC115573995;LOC115574060;LOC115574061;LOC115574193;LOC115574342;LOC115574485;LOC115574615;mtif3;nudt14;reps1;scara3;scg5                                                                                        |
| 22 | 14,500,000 | 15,000,000 | 0.5  | bpnt1;c22h12orf57;cnr1;extl3;LOC115573515;LOC115574247;LOC115574251;LOC115574380;LOC115574382;LOC115574442;LOC115574443;LOC115574518;LOC115574520;LOC115574523;LOC115574524;LOC115574610;LOC115574614;ptprk;rars2;rngtt;saysd1;slc35a1                                                                                      |
| 24 | 22,250,000 | 22,750,000 | 0.5  | LOC115576605;LOC115576613;LOC115576635;LOC115576647;LOC115576649;LOC115576664;LOC115576712;LOC115576725;LOC115576727;LOC115576966;LOC115576967;LOC115576968                                                                                                                                                                 |

Table S4:  $F_{ST}$  regions of high divergence in the comparison between nuclei A and C. Reported data includes: chromosome, beginning of the region (start), end of the region (end), size of the region (size) and genes contained in the regions (genes).

| chr | start      | end        | size (Mb) | genes                                                                                                                                                                                                                                                                                                                                                                                                                                                                                                                                                                                                                                                                                                                                                                                                                                                                                                                                                                                                                                                                                                                                                                                                                                                                                                                                                                                                                                                                                                                                                                                                                                                                                                                                                                                                                                                                                                                                                                                                                                                                                                                                                                                                                         |
|-----|------------|------------|-----------|-------------------------------------------------------------------------------------------------------------------------------------------------------------------------------------------------------------------------------------------------------------------------------------------------------------------------------------------------------------------------------------------------------------------------------------------------------------------------------------------------------------------------------------------------------------------------------------------------------------------------------------------------------------------------------------------------------------------------------------------------------------------------------------------------------------------------------------------------------------------------------------------------------------------------------------------------------------------------------------------------------------------------------------------------------------------------------------------------------------------------------------------------------------------------------------------------------------------------------------------------------------------------------------------------------------------------------------------------------------------------------------------------------------------------------------------------------------------------------------------------------------------------------------------------------------------------------------------------------------------------------------------------------------------------------------------------------------------------------------------------------------------------------------------------------------------------------------------------------------------------------------------------------------------------------------------------------------------------------------------------------------------------------------------------------------------------------------------------------------------------------------------------------------------------------------------------------------------------------|
| 3   | 23,750,000 | 31,000,000 | 7.25      | abcf1;adck5;agr2;bzw2;c3h5orf49;c3h6orf136;chtop;col22a1;cpsf1;ctdp1;eif3i;fam135b;gatad2b;ilf2;irx1;kcnk9;khdrbs3;kpna6;zgc:91944;LOC115577673;LOC115577688;LOC115577765;LOC115577776;LOC115577793;LOC115577801;LOC115577876;LOC115578217;LOC115578325;LOC115578329;LOC115578353;LOC115578354;LOC115578360;LOC115578361;LOC115578363;LOC115578364;LOC115578372;LOC115578389;LOC115578394;LOC115578396;LOC115578397;LOC115578402;LOC115578409;LOC115578410;LOC115578412;LOC115578413;LOC115578414;LOC115578417;LOC115578431;LOC115578450;LOC115578457;LOC115578467;LOC115578481;LOC115578486;LOC115578492;LOC115578508;LOC115578509;LOC115578510;LOC115578534;LOC115578546;LOC115578547;LOC115578568;LOC115578569;LOC115578570;LOC115578572;LOC115578573;LOC115578574;arid1ab;LOC115578681;LOC115578682;grb10a;LOC115578711;LOC115578718;LOC115578719;LOC115578720;LOC115578721;LOC115578722;LOC115578725;LOC115578739;LOC115578793;LOC115578806;fndc5b;LOC115578808;LOC115578809;LOC115578810;LOC115578821;LOC115578827;ptprua;LOC115578863;LOC115578897;LOC115578915;LOC115578921;LOC115578922;LOC115578929;LOC115578930;LOC115578932;LOC115578961;LOC115578965;LOC115578972;LOC115578979;LOC115578981;LOC115578983;LOC115578988;LOC115579055;rbbp7;LOC115579058;LOC115579059;LOC115579084;adcy2b;LOC115579115;LOC115579118;LOC115579127;LOC115579136;LOC115579144;LOC115579145;LOC115579146;LOC115579148;LOC115579149;LOC115579153;LOC115579154;LOC115579162;LOC115579163;LOC115579186;LOC115579195;LOC115579196;LOC115579232;LOC115579263;LOC115579303;LOC115579309;LOC115579369;LOC115579372;LOC115579399;LOC115579400;LOC115579415;LOC115579425;LOC115579426;LOC115579451;LOC115579460;LOC115579470;LOC115579474;LOC115579476;LOC115579503;LOC115579553;LOC115579554;LOC115579555;LOC115579556;LOC115579560;LOC115579561;LOC115579563;LOC115579570;LOC115579594;LOC115579595;LOC115579601;LOC115579602;LOC115579604;LOC115579607;LOC115579608;LOC115579611;med10;mfsd2a;mrps18b;mtturn;ndufs6;ngly1;nkiras1;Note=The;nr1d2;nsun2;nudc;oxsm;parp10;pex11b;pkib;ppp1r10;rarb;rpl14;rpl15;sf3a3;slc66a2;snapin;srd5a1;srfbp1;st3gal1;tent4a;tert;thrb;top2b;topaz1;trappc9;trim71;trit1;tspan13;txnip;txnl4a;ube2ql1;yars1 |
| 6   | 7,000,000  | 7,500,000  | 0.5       | blcap;LOC115582671;LOC115582672;LOC115582673;LOC115582842;LOC115582867;chd6;LOC115582955;ripor3;LOC115583557;LOC115583741;LOC115583743;mcm2;pigu;podxl2;psmf1;rbl1;tmem74b                                                                                                                                                                                                                                                                                                                                                                                                                                                                                                                                                                                                                                                                                                                                                                                                                                                                                                                                                                                                                                                                                                                                                                                                                                                                                                                                                                                                                                                                                                                                                                                                                                                                                                                                                                                                                                                                                                                                                                                                                                                    |
| 6   | 8,250,000  | 8,750,000  | 0.5       | aspn;ccdc71;cenpp;cept1;dram2;ecm2;hgh1;ippk;LOC115582539;LOC115582878;LOC115583443;LOC115583545;LOC115583574;LOC115583602;LOC115583604;LOC115584089;LOC115584122;nisch;no18;ogn;rbbp5;stab1                                                                                                                                                                                                                                                                                                                                                                                                                                                                                                                                                                                                                                                                                                                                                                                                                                                                                                                                                                                                                                                                                                                                                                                                                                                                                                                                                                                                                                                                                                                                                                                                                                                                                                                                                                                                                                                                                                                                                                                                                                  |
| 9   | 16,000,000 | 16,750,000 | 0.75      | acp6;bcl9;cd58;chaf1b;dop1b;fstl1;gja5;gja8;gpr156;gsk3b;igsf3;kcne1;klhl6;LOC115587460;LOC115587572;LOC115587587;LOC115587692;LOC115587699;LOC115587701;LOC115587784;LOC115587787;LOC115587965;LOC115588161;LOC115588281;LOC115588340;LOC115588378;LOC115588409;LOC115588412;LOC115588413;LOC115588414;LOC115588431;LOC115588432;LOC115588433;LOC115588434;LOC115588535;LOC115588615;lrcc58;maats1;morc3;nr1i2;rpe;slc5a3                                                                                                                                                                                                                                                                                                                                                                                                                                                                                                                                                                                                                                                                                                                                                                                                                                                                                                                                                                                                                                                                                                                                                                                                                                                                                                                                                                                                                                                                                                                                                                                                                                                                                                                                                                                                    |

|    |            |            |      |                                                                                                                                                                                                                                                                                                                                                                                                                                                                                                                                                                                           |
|----|------------|------------|------|-------------------------------------------------------------------------------------------------------------------------------------------------------------------------------------------------------------------------------------------------------------------------------------------------------------------------------------------------------------------------------------------------------------------------------------------------------------------------------------------------------------------------------------------------------------------------------------------|
| 9  | 21,500,000 | 22,250,000 | 0.75 | bin1;cflar;dip2a;ercc1;fam126b;LOC115587442;LOC115587507;LOC115587920;LOC115587921;LOC115587922;ptprna;LOC115588188;LOC115588189;LOC115588277;LOC115588290;LOC115588569;LOC115588570;LOC115588572;LOC115588573;LOC115588576;LOC115588577;LOC115588605;LOC115588606;LOC115588607;LOC115588609;LOC115588610;LOC115588618;LOC115588619;map3k13;pofut2;prmt2;snx4;tmem169;trpm2;xrcc5                                                                                                                                                                                                         |
| 10 | 2,250,000  | 2,750,000  | 0.5  | LOC115589993;LOC115590010;LOC115590019;LOC115590028;LOC115590030;LOC115590046;LOC115590049;LOC115590050;LOC115590069;LOC115590096;LOC115590103;LOC115590105;LOC115590107;LOC115590114;LOC115590121;LOC115590122;LOC115590132;LOC115590348;LOC115590349;LOC115590350;LOC115590351;LOC115590352;LOC115590354                                                                                                                                                                                                                                                                                |
| 11 | 20,500,000 | 21,500,000 | 1    | ccdc124;cluap1;LOC115590926;LOC115590950;LOC115591005;LOC115591006;LOC115591014;LOC115591020;ptprsa;LOC115591422;LOC115591555;LOC115591623;LOC115591624;LOC115591626;jak3;LOC115592047;mast3b;ndufa7;slc5a5;uhrf1;mast3                                                                                                                                                                                                                                                                                                                                                                   |
| 15 | 31,750,000 | 32,250,000 | 0.5  | bmpr1a;clhc1;rps27a;rtn4                                                                                                                                                                                                                                                                                                                                                                                                                                                                                                                                                                  |
| 17 | 18,500,000 | 19,250,000 | 0.75 | aplp1;has1;hsqb6;igflr1;kcnn4;kirrel2;kmt2b;lin37;LOC115567082;LOC115567083;LOC115567084;LOC115567085;LOC115567086;LOC115567088;LOC115567089;LOC115567090;LOC115567094;LOC115567095;LOC115567096;LOC115567097;LOC115567102;LOC115567103;LOC115567105;LOC115567106;LOC115567107;LOC115567108;LOC115567109;LOC115567110;LOC115567111;LOC115567115;LOC115567116;LOC115567117;LOC115567119;LOC115567121;LOC115567124;LOC115567125;LOC115567126;LOC115567427;LOC115567573;LOC115567574;LOC115567575;LOC115567610;LOC115567948;LOC115567979;nphs1;pilrb;plaur;proser3;psenen;smg9;spaca6;zbtb32 |
| 18 | 31,750,000 | 32,500,000 | 0.75 | atp8a1;bend4;clnk;enox2;grxcr1;gsr;hs3st1;LOC115568228;LOC115568245;LOC115568462;LOC115568934;slc4a11;LOC115568979;LOC115568980;sfxn5;shisa3;slc30a9;smyd5;znf518b                                                                                                                                                                                                                                                                                                                                                                                                                        |
| 24 | 20,000,000 | 20,500,000 | 0.5  | LOC115576539;LOC115576541;LOC115576543;LOC115576544;LOC115576545;LOC115576624;LOC115576699;LOC115576700;LOC115576701;LOC115576704;LOC115576708;LOC115576711;LOC115576713;LOC115576714;LOC115576720;LOC115576721;LOC115576723;LOC115576728;LOC115576986                                                                                                                                                                                                                                                                                                                                    |



Table S5:  $F_{ST}$  regions of high divergence in the comparison between nuclei B and C. Reported data includes: chromosome, begin of the region (start), end of the region (end), size of the region (size) and genes contained in the regions (genes)

| chr | start      | end        | size (Mb) | genes                                                                                                                                                                                                                                                                                                                                                                                      |
|-----|------------|------------|-----------|--------------------------------------------------------------------------------------------------------------------------------------------------------------------------------------------------------------------------------------------------------------------------------------------------------------------------------------------------------------------------------------------|
| 3   | 27,000,000 | 28,500,000 | 1.5       | col22a1;fam135b;kcnk9;LOC115577765;LOC115577776;LOC115578360;LOC115578389;LOC115578457;LOC115578508;arid1ab;LOC115578711;LOC115578915;LOC115578921;LOC115578922;LOC115578972;LOC115578983;LOC115578988;LOC115579084;LOC115579145;LOC115579146;LOC115579303;LOC115579372;LOC115579425;LOC115579426;LOC115579503;nudc;pkib;trappc9                                                           |
| 3   | 30,250,000 | 31,000,000 | 0.75      | abcf1;agr2;bzw2;c3h6orf136;chtop;gatad2b;ilf2;LOC115577673;LOC115578325;LOC115578329;LOC115578353;LOC115578354;LOC115578396;LOC115578397;LOC115578681;LOC115579196;LOC115579399;LOC115579400;LOC115579601;LOC115579602;LOC115579607;mrps18b;ngly1;oxsm;pex11b;ppp1r10;rarb;snapin;top2b;tspan13;txnip                                                                                      |
| 6   | 12,000,000 | 12,750,000 | 0.75      | apcdd1;asic1;bcdin3d;cers5;gpd1;LOC115582545;LOC115582593;LOC115582606;LOC115582924;LOC115582925;LOC115583137;LOC115583139;LOC115583141;LOC115583504;LOC115583733;LOC115583734;LOC115583735;LOC115583885;LOC115583932;LOC115583933;LOC115583934;LOC115583935;LOC115583936;LOC115584029;LOC115584031;manbal;ncoa5;ppp4r1;rab22a;smarcd1;src;trnat-ugu                                       |
| 6   | 14,750,000 | 15,750,000 | 1         | alas1;amhr2;arhgap9;b9d2;c6h12orf10;col2a1;dctn2;ddit3;gli1;iars1;igsf8;itga7;kif5a;LOC115582574;LOC115582595;LOC115582596;LOC115582791;LOC115582956;LOC115582957;LOC115583161;LOC115583164;LOC115583209;LOC115583459;LOC115583461;LOC115583463;LOC115583495;LOC115583666;LOC115584128;LOC115584129;LOC115584148;mars1;nckap1l;npff;pde1b;poc1a;ppp1r1a;r3hdm2;rpl29;sp1;sp7;tarbp2;tespa1 |
| 6   | 15,000,000 | 15,500,000 | 0.5       | amhr2;c6h12orf10;col2a1;dctn2;ddit3;igsf8;kif5a;LOC115582574;LOC115582595;LOC115582596;LOC115582791;LOC115582956;LOC115582957;LOC115583459;LOC115583461;LOC115583463;mars1;nckap1l;pde1b;ppp1r1a;sp1;sp7;tarbp2                                                                                                                                                                            |

|   |            |            |      |                                                                                                                                                                                                                                                                                                                                                                                                                                                                                                                                                                                                                                                                                                                                                                                                                                                                                                                                                                                                                                                                                                                                                                                                                                                                                                                                                                                                                                                                                                                                                                                                                                                                                                                                                                                                                                                                                                                                                                                                                                                                                                                                                                                                                                                                                                                                                                                                                                                                                                                                                                                                                                                                                                                                                                                                                           |
|---|------------|------------|------|---------------------------------------------------------------------------------------------------------------------------------------------------------------------------------------------------------------------------------------------------------------------------------------------------------------------------------------------------------------------------------------------------------------------------------------------------------------------------------------------------------------------------------------------------------------------------------------------------------------------------------------------------------------------------------------------------------------------------------------------------------------------------------------------------------------------------------------------------------------------------------------------------------------------------------------------------------------------------------------------------------------------------------------------------------------------------------------------------------------------------------------------------------------------------------------------------------------------------------------------------------------------------------------------------------------------------------------------------------------------------------------------------------------------------------------------------------------------------------------------------------------------------------------------------------------------------------------------------------------------------------------------------------------------------------------------------------------------------------------------------------------------------------------------------------------------------------------------------------------------------------------------------------------------------------------------------------------------------------------------------------------------------------------------------------------------------------------------------------------------------------------------------------------------------------------------------------------------------------------------------------------------------------------------------------------------------------------------------------------------------------------------------------------------------------------------------------------------------------------------------------------------------------------------------------------------------------------------------------------------------------------------------------------------------------------------------------------------------------------------------------------------------------------------------------------------------|
| 6 | 17,750,000 | 22,000,000 | 4.25 | <p>abhd14a;acy1;apof;b4galnt1;bap1;brk1;bysl;c6h1orf159;c6h1orf74;c6h3orf67;capzb;card19;cav3;ccdc174;ccdc36;celsr2;col7a1;cplane2;crbn;crocc;cse11;dstyk;edem1;eefsec;eif4enif1;emc3;erbb3;erc2;fancd2;fblim1;fbxo42;fkbp11;fkbp5;fndc10;gata2;grm2;h6pd;hdhd3;ikzf4;irf6;kbtd12;LOC115582523;LOC115582554;LOC115582555;LOC115582557;LOC115582567;LOC115582585;LOC115582587;LOC115582590;LOC115582602;LOC115582614;LOC115582615;LOC115582616;LOC115582618;LOC115582641;LOC115582664;LOC115582676;LOC115582677;LOC115582700;LOC115582703;LOC115582712;LOC115582727;LOC115582728;LOC115582750;LOC115582762;LOC115582782;LOC115582783;LOC115582810;LOC115582812;LOC115582823;LOC115582824;LOC115582826;LOC115582843;LOC115582844;LOC115582847;LOC115582880;LOC115582887;LOC115582896;LOC115582897;LOC115582901;LOC115582903;LOC115582904;LOC115582969;LOC115582992;LOC115582993;LOC115582994;LOC115582995;LOC115583000;LOC115583003;LOC115583004;LOC115583007;LOC115583009;LOC115583012;LOC115583014;LOC115583017;LOC115583019;LOC115583020;LOC115583023;LOC115583024;LOC115583025;LOC115583027;LOC115583030;LOC115583032;LOC115583035;LOC115583041;LOC115583042;LOC115583060;LOC115583074;LOC115583075;LOC115583080;LOC115583082;LOC115583083;LOC115583093;LOC115583096;LOC115583098;LOC115583099;LOC115583100;LOC115583104;LOC115583125;LOC115583127;LOC115583128;LOC115583129;LOC115583142;LOC115583143;LOC115583145;LOC115583146;LOC115583153;LOC115583155;LOC115583156;LOC115583189;LOC115583190;LOC115583191;LOC115583193;LOC115583195;LOC115583210;LOC115583342;LOC115583355;LOC115583408;LOC115583409;LOC115583412;LOC115583413;LOC115583426;LOC115583429;LOC115583452;LOC115583453;LOC115583464;LOC115583471;LOC115583472;LOC115583473;LOC115583474;LOC115583486;LOC115583560;LOC115583561;LOC115583609;LOC115583662;LOC115583664;LOC115583681;LOC115583682;LOC115583684;LOC115583685;LOC115583686;LOC115583708;LOC115583710;LOC115583713;LOC115583723;LOC115583739;LOC115583745;LOC115583761;LOC115583775;LOC115583776;LOC115583777;LOC115583780;LOC115583782;LOC115583790;LOC115583849;LOC115583850;LOC115583881;LOC115583883;LOC115583893;LOC115583897;LOC115583899;LOC115583901;LOC115583902;LOC115583919;LOC115583940;LOC115583941;LOC115583942;LOC115583943;LOC115583983;LOC115584034;LOC115584070;LOC115584071;LOC115584081;LOC115584088;LOC115584108;LOC115584113;LOC115584114;LOC115584115;LOC115584136;LOC115584137;LOC115584138;LOC115584144;LOC115584152;LOC115584194;med20;mfap2;mrpl20;nbl1;nckipsd;ndufaf3;necap2;Note=The;nuak2;os9;oxtr;p4htm;pa2g4;parp3;patz1;ppil1;prkag1;prkcd;rad18;rbm5;rft1;rps26;rrp9;ruvbl1;sfi1;sirt4;slc25a20;slc25a34;srgap3;srsf3;ssu72;stau1;strip1;szrd1;tatdn2;tex264;thumpd3;tmcc2;tmem43;tmem88b;tomm6;trnaf-gaa;trub2;tspo;uroc1;usp4;usp49;vhl;vwa1;wdr77</p> |
| 6 | 26,250,000 | 27,000,000 | 0.75 | <p>aggf1;celf4;dnai1;kiaa1328;LOC115582884;LOC115582918;LOC115583147;LOC115583179;LOC115583180;LOC115583507;LOC115583550;LOC115583553;LOC115583646;LOC115583767;LOC115583855;LOC115583925;LOC115583926;LOC115584130;myorg;nsg1;pxn;r3hcc1;rplp0;stx18;tmem233;tpgs2</p>                                                                                                                                                                                                                                                                                                                                                                                                                                                                                                                                                                                                                                                                                                                                                                                                                                                                                                                                                                                                                                                                                                                                                                                                                                                                                                                                                                                                                                                                                                                                                                                                                                                                                                                                                                                                                                                                                                                                                                                                                                                                                                                                                                                                                                                                                                                                                                                                                                                                                                                                                   |
| 6 | 37,000,000 | 38,000,000 | 1    | <p>helz2;LOC115582699;LOC115582786;LOC115582790;LOC115582792;LOC115582892;aldh1l1;LOC115583158;LOC115583211;LOC115583390;LOC115583508;LOC115583524;LOC115583769;LOC115583891;LOC115583953;LOC115584023;LOC115584056;nfasc;plekha6;zc3h11a</p>                                                                                                                                                                                                                                                                                                                                                                                                                                                                                                                                                                                                                                                                                                                                                                                                                                                                                                                                                                                                                                                                                                                                                                                                                                                                                                                                                                                                                                                                                                                                                                                                                                                                                                                                                                                                                                                                                                                                                                                                                                                                                                                                                                                                                                                                                                                                                                                                                                                                                                                                                                             |

|    |            |            |      |                                                                                                                                                                                                                                                                                                                                                                                                                                                                                                                                                                                                                                                                                         |
|----|------------|------------|------|-----------------------------------------------------------------------------------------------------------------------------------------------------------------------------------------------------------------------------------------------------------------------------------------------------------------------------------------------------------------------------------------------------------------------------------------------------------------------------------------------------------------------------------------------------------------------------------------------------------------------------------------------------------------------------------------|
| 9  | 15,750,000 | 16,500,000 | 0.75 | acp6;bcl9;btla;chaf1b;dop1b;fam155a;fstl1;gja5;gja8;gpr156;gsk3b;kcne1;LOC115587460;LOC115587467;LOC115587468;LOC115587469;LOC115587512;LOC115587558;LOC115587572;LOC115587601;LOC115587692;LOC115587784;LOC115587787;LOC115587965;LOC115588160;LOC115588161;LOC115588281;LOC115588345;LOC115588378;LOC115588409;LOC115588412;LOC115588413;LOC115588414;LOC115588517;LOC115588615;LOC115588645;lrcc58;maats1;morc3;nr1i2;pdzk1;slc5a3                                                                                                                                                                                                                                                   |
| 9  | 18,000,000 | 18,750,000 | 0.75 | adam23;agps;atf2;atp5mc3;chn1;chrna1;cir1;dock9;evx2;fam237a;gpr1;gpr155;hnnpa3;hoxd10;hoxd11;hoxd3;hoxd4;hoxd9;ino80d;lnpk;LOC115587472;LOC115587908;stk24;LOC115588208;LOC115588210;LOC115588211;LOC115588710;ndufs1;nfe2l2;ola1;osbpl6;pde11a;prkra;scn3;sp9                                                                                                                                                                                                                                                                                                                                                                                                                         |
| 17 | 18,500,000 | 19,250,000 | 0.75 | aplp1;has1;hspb6;igflr1;kcnn4;kirrel2;kmt2b;lin37;LOC115567082;LOC115567083;LOC115567084;LOC115567085;LOC115567086;LOC115567088;LOC115567089;LOC115567090;LOC115567094;LOC115567095;LOC115567096;LOC115567097;LOC115567102;LOC115567103;LOC115567105;LOC115567106;LOC115567107;LOC115567108;LOC115567109;LOC115567110;LOC115567111;LOC115567115;LOC115567116;LOC115567117;LOC115567119;LOC115567121;LOC115567124;LOC115567125;LOC115567126;LOC115567427;LOC115567573;LOC115567574;LOC115567575;LOC115567610;LOC115567948;LOC115567979;nphs1;pilrb;plaur;proser3;psenen;smg9;spaca6;zbtb32                                                                                               |
| 18 | 15,500,000 | 16,000,000 | 0.5  | fmr1;hdac3;LOC115568236;LOC115568441;LOC115568557;LOC115568808;LOC115568894;LOC115568898;rab33a                                                                                                                                                                                                                                                                                                                                                                                                                                                                                                                                                                                         |
| 18 | 31,500,000 | 33,000,000 | 1.5  | atp8a1;bend4;bod1l1;btik;clnk;cops6;enox2;fbxl12;gla;gpc2;grxcr1;gsr;hs3st1;LOC115568228;LOC115568245;LOC115568328;LOC115568375;LOC115568392;LOC115568462;LOC115568503;LOC115568505;LOC115568506;LOC115568658;LOC115568659;LOC115568660;LOC115568661;LOC115568662;LOC115568663;LOC115568664;LOC115568665;LOC115568666;LOC115568667;LOC115568668;LOC115568669;LOC115568723;LOC115568724;LOC115568725;LOC115568726;LOC115568729;LOC115568735;LOC115568737;LOC115568738;LOC115568739;LOC115568740;LOC115568885;LOC115568934;LOC115568977;LOC115568979;LOC115568980;LOC115569169;LOC115569171;mars2;mcm7;med12;nkx3-2;rab28;rpl36a;sfxn5;shisa3;slc30a9;smyd5;stag3;tim8a;trnal-aag;znf518b |

Table S6: Variant effect predictor of high impact variation in the  $F_{ST}$  regions

| chr | pos        | Allele | Gene               | Gene symbol | Consequence             |
|-----|------------|--------|--------------------|-------------|-------------------------|
| 3   | 23,786,331 | A      | ENSSAUG00010005037 | slc6a18     | splice_acceptor_variant |
| 3   | 23,793,969 | T      | ENSSAUG00010005043 | tert        | splice_acceptor_variant |
| 3   | 23,801,486 | C      | ENSSAUG00010005061 | RBBP7       | stop_lost               |
| 3   | 23,865,408 | C      | ENSSAUG00010005084 | yars1       | stop_lost               |
| 3   | 24,009,698 | T      | ENSSAUG00010006540 | fam49a1     | splice_donor_variant    |
| 3   | 24,136,370 | T      | ENSSAUG00010006618 | TRAK1       | stop_gained             |
| 3   | 24,241,732 | T      | ENSSAUG00010006635 | -           | stop_gained             |
| 3   | 24,286,730 | T      | ENSSAUG00010006641 | -           | splice_acceptor_variant |
| 3   | 24,506,671 | A      | ENSSAUG00010006657 | -           | stop_gained             |
| 3   | 24,555,500 | T      | ENSSAUG00010006658 | -           | stop_gained             |
| 3   | 24,556,819 | T      | ENSSAUG00010006658 | -           | stop_gained             |
| 3   | 24,572,859 | G      | ENSSAUG00010006661 | -           | splice_donor_variant    |
| 3   | 24,640,520 | T      | ENSSAUG00010006671 | grb10a      | stop_gained             |
| 3   | 24,640,600 | A      | ENSSAUG00010006671 | grb10a      | stop_gained             |
| 3   | 24,687,470 | A      | ENSSAUG00010006705 | trioa       | splice_donor_variant    |
| 3   | 24,687,470 | A      | ENSSAUG00010006705 | trioa       | splice_donor_variant    |
| 3   | 24,795,307 | A      | ENSSAUG00010006753 | adcy2b      | stop_gained             |
| 3   | 24,795,307 | A      | ENSSAUG00010006753 | adcy2b      | stop_gained             |
| 3   | 24,795,307 | A      | ENSSAUG00010006753 | adcy2b      | stop_gained             |
| 3   | 24,795,307 | A      | ENSSAUG00010006753 | adcy2b      | stop_gained             |
| 3   | 24,853,473 | T      | ENSSAUG00010008753 | tent4a      | splice_acceptor_variant |
| 3   | 25,532,913 | A      | ENSSAUG00010008863 | fndc5b      | stop_gained             |
| 3   | 25,585,504 | A      | ENSSAUG00010008865 | -           | stop_gained             |
| 3   | 26,129,353 | G      | ENSSAUG00010000814 | zgc:91944   | stop_lost               |
| 3   | 26,146,149 | T      | ENSSAUG00010000822 | -           | stop_lost               |
| 3   | 26,555,336 | T      | ENSSAUG00010000978 | cpsf1       | splice_donor_variant    |
| 3   | 26,566,540 | T      | ENSSAUG00010000978 | cpsf1       | splice_donor_variant    |
| 3   | 26,566,540 | T      | ENSSAUG00010000978 | cpsf1       | splice_donor_variant    |
| 3   | 26,566,540 | T      | ENSSAUG00010000978 | cpsf1       | splice_donor_variant    |
| 3   | 26,572,779 | A      | ENSSAUG00010007232 | -           | splice_acceptor_variant |
| 3   | 26,572,780 | G      | ENSSAUG00010007232 | -           | splice_acceptor_variant |
| 3   | 26,572,813 | G      | ENSSAUG00010007232 | -           | splice_donor_variant    |
| 3   | 27,064,623 | G      | ENSSAUG00010007238 | FAM135B     | splice_acceptor_variant |
| 3   | 27,630,256 | C      | ENSSAUG00010007291 | arid1ab     | stop_gained             |
| 3   | 27,657,190 | A      | ENSSAUG00010007291 | arid1ab     | splice_donor_variant    |
| 3   | 28,540,731 | A      | ENSSAUG00010008010 | -           | stop_gained             |
| 3   | 28,704,907 | T      | ENSSAUG00010008056 | ptprua      | stop_gained             |
| 3   | 28,763,272 | G      | ENSSAUG00010008056 | ptprua      | splice_donor_variant    |
| 3   | 28,792,771 | C      | ENSSAUG00010008056 | ptprua      | stop_gained             |
| 3   | 28,792,771 | C      | ENSSAUG00010008056 | ptprua      | stop_gained             |
| 3   | 28,812,844 | T      | ENSSAUG00010008056 | ptprua      | start_lost              |
| 3   | 30,299,861 | A      | ENSSAUG00010014936 | -           | stop_gained             |
| 3   | 30,993,630 | A      | ENSSAUG00010005142 | -           | splice_donor_variant    |

|   |            |   |                    |                   |                         |
|---|------------|---|--------------------|-------------------|-------------------------|
| 6 | 7,156,030  | A | ENSSAUG00010014707 | chd6              | stop_gained             |
| 6 | 7,156,030  | A | ENSSAUG00010014707 | chd6              | stop_gained             |
| 6 | 7,156,030  | A | ENSSAUG00010014707 | chd6              | stop_gained             |
| 6 | 7,156,030  | A | ENSSAUG00010014707 | chd6              | stop_gained             |
| 6 | 7,156,030  | A | ENSSAUG00010014707 | chd6              | stop_gained             |
| 6 | 7,156,692  | T | ENSSAUG00010014707 | chd6              | splice_acceptor_variant |
| 6 | 7,156,692  | T | ENSSAUG00010014707 | chd6              | splice_acceptor_variant |
| 6 | 7,156,692  | T | ENSSAUG00010014707 | chd6              | splice_acceptor_variant |
| 6 | 7,318,187  | T | ENSSAUG00010015434 | ripor3            | splice_acceptor_variant |
| 6 | 7,331,908  | T | ENSSAUG00010015434 | ripor3            | stop_gained             |
| 6 | 7,348,841  | A | ENSSAUG00010015438 | -                 | stop_gained             |
| 6 | 7,428,322  | C | ENSSAUG00010015485 | rbl1              | splice_acceptor_variant |
| 6 | 7,429,621  | A | ENSSAUG00010015485 | rbl1              | splice_donor_variant    |
| 6 | 7,434,847  | G | ENSSAUG00010015485 | rbl1              | splice_acceptor_variant |
| 6 | 7,434,939  | T | ENSSAUG00010015485 | rbl1              | splice_donor_variant    |
| 6 | 7,434,978  | A | ENSSAUG00010015485 | rbl1              | stop_gained             |
| 6 | 7,435,063  | T | ENSSAUG00010015485 | rbl1              | splice_donor_variant    |
| 6 | 7,438,846  | A | ENSSAUG00010015485 | rbl1              | stop_gained             |
| 6 | 7,470,142  | A | ENSSAUG00010016301 | si:ch211-193l2.10 | splice_acceptor_variant |
| 6 | 7,487,795  | A | ENSSAUG00010016308 | -                 | splice_acceptor_variant |
| 6 | 7,487,795  | A | ENSSAUG00010016308 | -                 | splice_acceptor_variant |
| 6 | 7,487,795  | A | ENSSAUG00010016308 | -                 | splice_acceptor_variant |
| 6 | 7,487,795  | A | ENSSAUG00010016308 | -                 | splice_acceptor_variant |
| 6 | 8,384,418  | T | ENSSAUG00010022893 | -                 | stop_gained             |
| 6 | 8,424,704  | G | ENSSAUG00010022897 | rbbp5             | stop_lost               |
| 6 | 8,531,912  | G | ENSSAUG00010022904 | cenpp             | splice_donor_variant    |
| 6 | 8,543,035  | T | ENSSAUG00010022915 | nol8              | stop_lost               |
| 6 | 8,660,158  | A | ENSSAUG00010022933 | atp2b4            | splice_donor_variant    |
| 6 | 8,678,277  | A | ENSSAUG00010022933 | atp2b4            | splice_acceptor_variant |
| 6 | 8,728,969  | T | ENSSAUG00010023294 | cept1b            | stop_gained             |
| 6 | 8,731,610  | T | ENSSAUG00010023294 | cept1b            | splice_acceptor_variant |
| 6 | 12,309,176 | T | ENSSAUG00010000584 | slc12a5a          | splice_donor_variant    |
| 6 | 12,309,176 | T | ENSSAUG00010000584 | slc12a5a          | splice_donor_variant    |
| 6 | 12,502,889 | G | ENSSAUG00010000663 | cyp24a1           | start_lost              |
| 6 | 12,714,565 | A | ENSSAUG00010003785 | smarcd1           | splice_donor_variant    |
| 6 | 15,115,037 | G | ENSSAUG00010024021 | soat2             | splice_acceptor_variant |
| 6 | 15,221,722 | C | ENSSAUG00010024036 | AMHR2             | start_lost              |
| 6 | 15,423,721 | T | ENSSAUG00010024435 | NCKAP1L           | stop_gained             |
| 6 | 18,091,491 | G | ENSSAUG00010020707 | uba7              | start_lost              |
| 6 | 18,989,322 | A | ENSSAUG00010020171 | slc6a22.2         | splice_acceptor_variant |
| 6 | 19,679,068 | T | ENSSAUG00010024949 | il17rc            | splice_donor_variant    |
| 6 | 19,741,584 | A | ENSSAUG00010025014 | card19            | stop_lost               |
| 6 | 19,741,585 | G | ENSSAUG00010025014 | card19            | stop_lost               |
| 6 | 20,428,092 | A | ENSSAUG00010000831 | dstyk             | stop_gained             |
| 6 | 20,570,980 | A | ENSSAUG00010002489 | -                 | stop_gained             |

|   |            |   |                    |                  |                                   |
|---|------------|---|--------------------|------------------|-----------------------------------|
| 6 | 20,785,353 | T | ENSSAUG00010003779 | thumpd3          | stop_gained                       |
| 6 | 21,388,170 | A | ENSSAUG00010013342 | -                | stop_gained                       |
| 6 | 21,699,210 | T | ENSSAUG00010014159 | prkcda           | splice_donor_variant              |
| 6 | 21,699,210 | T | ENSSAUG00010014159 | prkcda           | splice_donor_variant              |
| 6 | 21,699,210 | T | ENSSAUG00010014159 | prkcda           | splice_donor_variant              |
| 6 | 21,810,238 | T | ENSSAUG00010015226 | erbb3a           | stop_gained                       |
| 6 | 22,064,354 | T | ENSSAUG00010000527 | -                | stop_gained                       |
| 6 | 22,091,471 | T | ENSSAUG00010000544 | -                | stop_gained                       |
| 6 | 22,167,505 | G | ENSSAUG00010000558 | NEUROD4          | stop_lost                         |
| 6 | 22,479,353 | T | ENSSAUG00010023012 | slc4a8           | stop_gained                       |
| 6 | 22,687,968 | A | ENSSAUG00010023977 | esyt1b           | splice_donor_variant              |
| 6 | 22,691,890 | T | ENSSAUG00010023977 | esyt1b           | splice_donor_variant              |
| 6 | 22,693,336 | G | ENSSAUG00010023977 | esyt1b           | splice_acceptor_variant           |
| 6 | 22,700,591 | A | ENSSAUG00010023977 | esyt1b           | stop_gained                       |
| 6 | 22,702,061 | G | ENSSAUG00010023977 | esyt1b           | stop_gained                       |
| 6 | 22,702,111 | G | ENSSAUG00010023977 | esyt1b           | stop_lost                         |
| 6 | 23,056,527 | G | ENSSAUG00010024301 | pip4k2cb         | start_lost                        |
| 6 | 23,407,018 | T | ENSSAUG00010025152 | ANKRD52          | stop_gained                       |
| 6 | 27,184,744 | T | ENSSAUG00010003911 | pcsk1            | stop_gained,splice_region_variant |
| 6 | 27,627,994 | G | ENSSAUG00010006718 | Mx1              | splice_acceptor_variant           |
| 6 | 27,800,454 | C | ENSSAUG00010007036 | adamts9          | stop_gained                       |
| 6 | 27,800,454 | C | ENSSAUG00010007036 | adamts9          | stop_gained                       |
| 6 | 27,800,454 | C | ENSSAUG00010007036 | adamts9          | stop_gained                       |
| 6 | 28,266,426 | T | ENSSAUG00010007915 | -                | stop_gained                       |
| 6 | 28,323,358 | T | ENSSAUG00010007929 | suc1g2           | stop_gained                       |
| 6 | 28,323,358 | T | ENSSAUG00010007929 | suc1g2           | stop_gained                       |
| 6 | 28,394,700 | C | ENSSAUG00010007929 | suc1g2           | splice_donor_variant              |
| 6 | 29,015,976 | A | ENSSAUG00010010704 | hmces            | stop_gained                       |
| 6 | 29,026,131 | A | ENSSAUG00010010721 | uqcrc1           | splice_donor_variant              |
| 6 | 29,142,811 | T | ENSSAUG00010000378 | si:dkey-202e22.2 | stop_gained                       |
| 6 | 29,172,133 | C | ENSSAUG00010000485 | dnah1            | splice_donor_variant              |
| 6 | 29,197,382 | T | ENSSAUG00010000892 | mapkapk3         | splice_donor_variant              |
| 6 | 29,262,645 | A | ENSSAUG00010000992 | rae1             | splice_donor_variant              |
| 6 | 29,277,130 | A | ENSSAUG00010001062 | bmp7a            | splice_donor_variant              |
| 6 | 29,280,816 | T | ENSSAUG00010001064 | -                | stop_gained                       |
| 6 | 29,432,203 | A | ENSSAUG00010001139 | cdh4             | stop_gained                       |
| 6 | 29,720,416 | A | ENSSAUG00010006601 | ogfr12           | splice_acceptor_variant           |
| 6 | 29,882,992 | T | ENSSAUG00010010207 | sulf2a           | splice_donor_variant              |
| 6 | 29,976,684 | A | ENSSAUG00010011005 | ndrg3a           | stop_gained                       |
| 6 | 29,988,008 | A | ENSSAUG00010012056 | trpc4apa         | stop_gained                       |
| 6 | 29,992,479 | A | ENSSAUG00010012056 | trpc4apa         | splice_donor_variant              |
| 6 | 29,992,479 | A | ENSSAUG00010012056 | trpc4apa         | splice_donor_variant              |
| 6 | 29,992,479 | A | ENSSAUG00010012056 | trpc4apa         | splice_donor_variant              |
| 6 | 29,992,479 | A | ENSSAUG00010012056 | trpc4apa         | splice_donor_variant              |

|   |            |   |                    |          |                         |
|---|------------|---|--------------------|----------|-------------------------|
| 6 | 29,994,673 | C | ENSSAUG00010012056 | trpc4apa | splice_acceptor_variant |
| 6 | 30,002,744 | T | ENSSAUG00010013596 | myh7ba   | splice_donor_variant    |
| 6 | 30,002,847 | C | ENSSAUG00010013596 | myh7ba   | splice_acceptor_variant |
| 6 | 30,007,560 | G | ENSSAUG00010013596 | myh7ba   | splice_donor_variant    |
| 6 | 30,007,565 | T | ENSSAUG00010013596 | myh7ba   | stop_gained             |
| 6 | 30,009,927 | T | ENSSAUG00010013596 | myh7ba   | splice_donor_variant    |
| 6 | 30,049,463 | G | ENSSAUG00010013623 | -        | start_lost              |
| 6 | 30,157,474 | T | ENSSAUG00010014373 | hcfc1a   | splice_acceptor_variant |
| 6 | 30,157,474 | T | ENSSAUG00010014373 | hcfc1a   | splice_acceptor_variant |
| 6 | 30,174,362 | A | ENSSAUG00010014432 | opn1sw2  | splice_donor_variant    |
| 6 | 30,174,586 | A | ENSSAUG00010014432 | opn1sw2  | splice_acceptor_variant |
| 6 | 30,215,933 | T | ENSSAUG00010014492 | cxxc1b   | stop_gained             |
| 6 | 30,259,105 | T | ENSSAUG00010014567 | SRPK3    | splice_acceptor_variant |
| 6 | 30,259,105 | T | ENSSAUG00010014567 | SRPK3    | splice_acceptor_variant |
| 6 | 30,259,105 | T | ENSSAUG00010014567 | SRPK3    | splice_acceptor_variant |
| 6 | 30,259,105 | T | ENSSAUG00010014567 | SRPK3    | splice_acceptor_variant |
| 6 | 30,259,105 | T | ENSSAUG00010014567 | SRPK3    | splice_acceptor_variant |
| 6 | 30,274,696 | T | ENSSAUG00010017188 | grm6b    | stop_gained             |
| 6 | 34,533,046 | G | ENSSAUG00010018076 | fbln2    | stop_gained             |
| 6 | 34,555,978 | A | ENSSAUG00010018076 | fbln2    | splice_donor_variant    |
| 6 | 34,976,226 | C | ENSSAUG00010018186 | fam120a  | splice_donor_variant    |
| 6 | 35,011,678 | T | ENSSAUG00010018190 | cass4    | stop_gained             |
| 6 | 35,011,678 | T | ENSSAUG00010018190 | cass4    | stop_gained             |
| 6 | 37,429,304 | T | ENSSAUG00010001684 | plekha6  | splice_donor_variant    |
| 6 | 37,429,304 | T | ENSSAUG00010001684 | plekha6  | splice_donor_variant    |
| 6 | 37,429,304 | T | ENSSAUG00010001684 | plekha6  | splice_donor_variant    |
| 6 | 37,429,304 | T | ENSSAUG00010001684 | plekha6  | splice_donor_variant    |
| 6 | 37,429,304 | T | ENSSAUG00010001684 | plekha6  | splice_donor_variant    |
| 6 | 37,537,169 | C | ENSSAUG00010002761 | ALDH1L1  | stop_lost               |
| 6 | 37,537,169 | C | ENSSAUG00010002761 | ALDH1L1  | stop_lost               |
| 9 | 16,167,058 | A | ENSSAUG00010014986 | -        | splice_donor_variant    |
| 9 | 16,170,741 | G | ENSSAUG00010014986 | -        | stop_lost               |
| 9 | 16,400,789 | A | ENSSAUG00010015009 | dop1b    | splice_donor_variant    |
| 9 | 16,400,789 | A | ENSSAUG00010015009 | dop1b    | splice_donor_variant    |
| 9 | 16,459,929 | A | ENSSAUG00010015074 | casq2    | stop_gained             |
| 9 | 16,728,696 | T | ENSSAUG00010015320 | -        | stop_gained             |
| 9 | 16,728,696 | T | ENSSAUG00010015320 | -        | stop_gained             |
| 9 | 16,728,696 | T | ENSSAUG00010015320 | -        | stop_gained             |
| 9 | 16,728,696 | T | ENSSAUG00010015320 | -        | stop_gained             |
| 9 | 16,728,696 | T | ENSSAUG00010015320 | -        | stop_gained             |
| 9 | 16,728,696 | T | ENSSAUG00010015320 | -        | stop_gained             |
| 9 | 16,728,696 | T | ENSSAUG00010015320 | -        | stop_gained             |
| 9 | 16,728,696 | T | ENSSAUG00010015320 | -        | stop_gained             |
| 9 | 16,728,696 | T | ENSSAUG00010015320 | -        | stop_gained             |
| 9 | 16,728,696 | T | ENSSAUG00010015320 | -        | stop_gained             |
| 9 | 16,729,367 | T | ENSSAUG00010015320 | -        | stop_gained             |

|    |            |   |                    |          |                         |
|----|------------|---|--------------------|----------|-------------------------|
| 9  | 16,729,367 | T | ENSSAUG00010015320 | -        | stop_gained             |
| 9  | 16,729,367 | T | ENSSAUG00010015320 | -        | stop_gained             |
| 9  | 18,060,493 | A | ENSSAUG00010021366 | stk24a   | stop_gained             |
| 9  | 18,060,493 | A | ENSSAUG00010021366 | stk24a   | stop_gained             |
| 9  | 21,512,679 | T | ENSSAUG00010027408 | xrcc5    | splice_donor_variant    |
| 9  | 21,512,680 | A | ENSSAUG00010027408 | xrcc5    | splice_donor_variant    |
| 9  | 21,757,990 | C | ENSSAUG00010027611 | -        | stop_gained             |
| 9  | 21,759,656 | C | ENSSAUG00010027611 | -        | start_lost              |
| 9  | 22,195,730 | T | ENSSAUG00010027671 | ptprna   | stop_gained             |
| 11 | 20,619,984 | T | ENSSAUG00010027717 | ptprsa   | stop_gained             |
| 11 | 20,620,351 | T | ENSSAUG00010027717 | ptprsa   | start_lost              |
| 11 | 21,277,161 | T | ENSSAUG00010005991 | uhfrf1   | start_lost              |
| 11 | 21,347,395 | T | ENSSAUG00010006107 | jak3     | stop_gained             |
| 11 | 21,350,423 | C | ENSSAUG00010007447 | -        | splice_donor_variant    |
| 11 | 21,483,392 | G | ENSSAUG00010007484 | mast3b   | stop_lost               |
| 11 | 21,483,422 | A | ENSSAUG00010007484 | mast3b   | stop_gained             |
| 11 | 21,484,789 | A | ENSSAUG00010007484 | mast3b   | splice_donor_variant    |
| 11 | 21,484,789 | A | ENSSAUG00010007484 | mast3b   | splice_donor_variant    |
| 11 | 21,484,789 | A | ENSSAUG00010007484 | mast3b   | splice_donor_variant    |
| 11 | 21,484,789 | A | ENSSAUG00010007484 | mast3b   | splice_donor_variant    |
| 17 | 4,558,556  | C | ENSSAUG00010003783 | cnot10   | splice_donor_variant    |
| 17 | 4,558,556  | C | ENSSAUG00010003783 | cnot10   | splice_donor_variant    |
| 17 | 4,558,556  | C | ENSSAUG00010003783 | cnot10   | splice_donor_variant    |
| 17 | 4,797,971  | A | ENSSAUG00010007245 | -        | stop_gained             |
| 17 | 5,121,820  | A | ENSSAUG00010007302 | -        | stop_gained             |
| 17 | 5,121,820  | A | ENSSAUG00010007302 | -        | stop_gained             |
| 17 | 18,885,092 | T | ENSSAUG00010021226 | -        | splice_donor_variant    |
| 17 | 18,926,927 | T | ENSSAUG00010021238 | -        | splice_donor_variant    |
| 18 | 15,594,896 | T | ENSSAUG00010017998 | il1rapl2 | splice_acceptor_variant |
| 18 | 15,594,896 | T | ENSSAUG00010017998 | il1rapl2 | splice_acceptor_variant |
| 18 | 31,554,538 | A | ENSSAUG00010015403 | med12    | stop_lost               |
| 18 | 31,554,674 | C | ENSSAUG00010015403 | med12    | splice_acceptor_variant |
| 18 | 31,554,705 | T | ENSSAUG00010015403 | med12    | splice_donor_variant    |
| 18 | 31,555,189 | C | ENSSAUG00010015403 | med12    | stop_lost               |
| 18 | 31,556,781 | T | ENSSAUG00010015403 | med12    | stop_gained             |
| 18 | 31,556,781 | T | ENSSAUG00010015403 | med12    | stop_gained             |
| 18 | 31,567,639 | C | ENSSAUG00010015403 | med12    | stop_gained             |
| 18 | 31,567,639 | C | ENSSAUG00010015403 | med12    | stop_gained             |
| 18 | 31,585,170 | G | ENSSAUG00010015424 | -        | splice_donor_variant    |
| 18 | 31,585,170 | G | ENSSAUG00010015424 | -        | splice_donor_variant    |
| 18 | 31,598,519 | T | ENSSAUG00010015424 | -        | stop_gained             |
| 18 | 31,601,430 | T | ENSSAUG00010015424 | -        | splice_donor_variant    |
| 18 | 31,957,979 | G | ENSSAUG00010015745 | -        | start_lost              |
| 18 | 32,090,408 | G | ENSSAUG00010015763 | SLC4A11  | start_lost              |
| 18 | 32,090,798 | T | ENSSAUG00010015763 | SLC4A11  | splice_acceptor_variant |
| 18 | 32,090,832 | A | ENSSAUG00010015763 | SLC4A11  | stop_gained             |
| 18 | 32,218,796 | T | ENSSAUG00010016267 | smyd5    | splice_acceptor_variant |



|    |            |   |                    |         |                                                    |
|----|------------|---|--------------------|---------|----------------------------------------------------|
| 18 | 32,218,796 | T | ENSSAUG00010016267 | smyd5   | splice_acceptor_variant                            |
| 18 | 32,219,210 | A | ENSSAUG00010016267 | smyd5   | stop_gained                                        |
| 18 | 32,219,403 | A | ENSSAUG00010016267 | smyd5   | start_lost                                         |
| 18 | 32,228,654 | G | ENSSAUG00010017169 | sfxn5b  | splice_donor_variant                               |
| 18 | 32,238,212 | T | ENSSAUG00010017175 | -       | splice_donor_variant                               |
| 18 | 32,247,183 | G | ENSSAUG00010017177 | -       | stop_lost                                          |
| 18 | 32,247,260 | A | ENSSAUG00010017177 | -       | splice_acceptor_variant                            |
| 18 | 32,335,270 | T | ENSSAUG00010017273 | atp8a1  | splice_acceptor_variant                            |
| 18 | 32,335,270 | T | ENSSAUG00010017273 | atp8a1  | splice_acceptor_variant                            |
| 18 | 32,335,320 | A | ENSSAUG00010017273 | atp8a1  | splice_acceptor_variant                            |
| 18 | 32,335,320 | A | ENSSAUG00010017273 | atp8a1  | splice_acceptor_variant                            |
| 18 | 32,335,320 | A | ENSSAUG00010017273 | atp8a1  | splice_acceptor_variant                            |
| 18 | 32,371,403 | C | ENSSAUG00010017273 | atp8a1  | splice_donor_variant                               |
| 18 | 32,422,020 | T | ENSSAUG00010022108 | slc30a9 | splice_donor_variant                               |
| 18 | 32,696,108 | G | ENSSAUG00010022821 | RAB28   | stop_lost                                          |
| 18 | 32,793,475 | C | ENSSAUG00010022862 | gpc2    | start_lost                                         |
| 18 | 32,799,383 | C | ENSSAUG00010022862 | gpc2    | splice_donor_variant                               |
| 18 | 32,799,383 | C | ENSSAUG00010022862 | gpc2    | splice_donor_variant                               |
| 18 | 32,799,383 | C | ENSSAUG00010022862 | gpc2    | splice_donor_variant                               |
| 18 | 32,799,383 | C | ENSSAUG00010022862 | gpc2    | splice_donor_variant                               |
| 18 | 32,799,384 | T | ENSSAUG00010022862 | gpc2    | splice_donor_variant                               |
| 18 | 32,799,384 | T | ENSSAUG00010022862 | gpc2    | splice_donor_variant                               |
| 18 | 32,799,384 | T | ENSSAUG00010022862 | gpc2    | splice_donor_variant                               |
| 18 | 32,799,384 | T | ENSSAUG00010022862 | gpc2    | splice_donor_variant                               |
| 18 | 32,810,702 | T | ENSSAUG00010022943 | -       | stop_gained                                        |
| 18 | 32,810,702 | T | ENSSAUG00010022943 | -       | stop_gained                                        |
| 18 | 32,814,389 | A | ENSSAUG00010022943 | -       | stop_gained                                        |
| 18 | 32,814,389 | A | ENSSAUG00010022943 | -       | stop_gained                                        |
| 18 | 32,814,389 | A | ENSSAUG00010022943 | -       | stop_gained                                        |
| 18 | 32,818,918 | A | ENSSAUG00010022943 | -       | stop_gained                                        |
| 18 | 32,958,078 | A | ENSSAUG00010022971 | -       | splice_donor_variant                               |
| 19 | 2,002,552  | T | ENSSAUG00010016425 | -       | stop_gained                                        |
| 22 | 13,235,768 | C | ENSSAUG00010015670 | aven    | stop_gained                                        |
| 24 | 20,104,631 | T | ENSSAUG00010026221 | -       | splice_donor_variant,non_coding_transcript_variant |
| 24 | 20,357,071 | T | ENSSAUG00010026252 | -       | start_lost                                         |

Table S7: Non-redundant Gene Ontology (GO) Term list for the different comparisons, including GO term code, GO term biological process name, fold enrichment, false discovery rate (FDR) value and genes included in the enrichment.

| A-B        |                                                  |                 |       |                                                                                                                                                                                                                                                                                                                                                                                                                                                                                                                                                        |
|------------|--------------------------------------------------|-----------------|-------|--------------------------------------------------------------------------------------------------------------------------------------------------------------------------------------------------------------------------------------------------------------------------------------------------------------------------------------------------------------------------------------------------------------------------------------------------------------------------------------------------------------------------------------------------------|
| Go term    | GO name                                          | fold enrichment | fdr   | genes                                                                                                                                                                                                                                                                                                                                                                                                                                                                                                                                                  |
| GO:0008152 | metabolic process                                | 1.70            | 0.000 | myorg;ube2r2;espl1;ell2;rps26;ruvbl1;cnr1;bpnt1;uroc1;rad18;idh3b;iars1;rngtt;hace1;ptpdc1;prkag1;mettl1;mtif3;gla;traip;cnot10;tarbp2;hadhb;kbtd8;ubap1;rbm5;nudt14;phf2;tsfm;rwdd1;cxc1b;edem1;fmr1;ctsz;eogt;rrp9;hdac3;alas1;nudt2;ppp4r1;adamts9;dcaf12;hmces;smug1;rft1;ptprk;mmp19;lyar;rpl29;mst1;cers5;mars2;mars1;eefsec;rpl36a;usp4;os9;crbn;rplp0;btck;camkv;thumpd3;tpgs2;aldh1l1;timeless;pcsk1;gnl3l;cdk4;src;fancd2;cdk2;sucg2;apof;rae1;extl3;h6pd;rpn1;trpc4apa;rars2;celf4;vhl;ptpra;parp3;thoc7;npepl1;bcdin3d;psmd6;suox;mapkapk3 |
| GO:0006139 | nucleobase-containing compound metabolic process | 2.36            | 0.002 | ell2;smug1;ruvbl1;rad18;lyar;iars1;mars2;rngtt;mars1;mettl1;traip;cnot10;thumpd3;timeless;tarbp2;gnl3l;fancd2;sucg2;rbm5;nudt14;h6pd;cxc1b;fmr1;rars2;celf4;vhl;parp3;thoc7;rrp9;bcdin3d;nudt2                                                                                                                                                                                                                                                                                                                                                         |
| GO:1901360 | organic cyclic compound metabolic process        | 2.27            | 0.002 | ell2;smug1;ruvbl1;rad18;lyar;iars1;mars2;rngtt;mars1;mettl1;traip;cnot10;thumpd3;aldh1l1;timeless;tarbp2;gnl3l;fancd2;sucg2;apof;rbm5;nudt14;h6pd;cxc1b;fmr1;rars2;celf4;vhl;parp3;thoc7;rrp9;bcdin3d;alas1;nudt2                                                                                                                                                                                                                                                                                                                                      |
| GO:0071704 | organic substance metabolic process              | 1.76            | 0.000 | myorg;ube2r2;espl1;ell2;rps26;ruvbl1;cnr1;bpnt1;uroc1;rad18;idh3b;iars1;rngtt;hace1;prkag1;mettl1;mtif3;gla;traip;cnot10;tarbp2;hadhb;kbtd8;ubap1;rbm5;nudt14;phf2;tsfm;rwdd1;cxc1b;edem1;fmr1;ctsz;eogt;rrp9;hdac3;alas1;nudt2;ppp4r1;adamts9;dcaf12;hmces;smug1;rft1;ptprk;mmp19;lyar;rpl29;mst1;cers5;mars2;mars1;eefsec;rpl36a;usp4;os9;crbn;rplp0;btck;camkv;thumpd3;tpgs2;aldh1l1;timeless;pcsk1;gnl3l;cdk4;src;fancd2;cdk2;sucg2;apof;rae1;extl3;h6pd;rpn1;trpc4apa;rars2;celf4;vhl;ptpra;parp3;thoc7;npepl1;bcdin3d;psmd6;mapkapk3             |
| GO:0046483 | heterocycle metabolic process                    | 2.37            | 0.001 | ell2;smug1;ruvbl1;rad18;lyar;iars1;mars2;rngtt;mars1;mettl1;traip;cnot10;thumpd3;aldh1l1;timeless;tarbp2;gnl3l;fancd2;sucg2;rbm5;nudt14;h6pd;cxc1b;fmr1;rars2;celf4;vhl;parp3;thoc7;rrp9;bcdin3d;alas1;nudt2                                                                                                                                                                                                                                                                                                                                           |
| GO:0044237 | cellular metabolic process                       | 1.79            | 0.000 | ube2r2;ell2;rps26;ruvbl1;cnr1;bpnt1;uroc1;rad18;idh3b;iars1;rngtt;hace1;ptpdc1;prkag1;mettl1;mtif3;gla;traip;cnot10;tarbp2;hadhb;ubap1;rbm5;nudt14;tsfm;rwdd1;cxc1b;edem1;fmr1;eogt;rrp9;alas1;nudt2;ppp4r1;smug1;rft1;ptprk;lyar;rpl29;cers5;mars2;mars1;eefsec;rpl36a;usp4;os9;crbn;rplp0;btck;camkv;thumpd3;aldh1l1;timeless;pcsk1;gnl3l;cdk4;src;fancd2;cdk2;sucg2;extl3;h6pd;rpn1;trpc4apa;rars2;celf4;vhl;ptpra;parp3;thoc7;bcdin3d;psmd6;suox;mapkapk3                                                                                          |

|            |                                              |       |       |                                                                                                                                                                                                                                                                                                                                                                                                                                                                                                                                                                                                                                                                                                                                                                                                                                                                                                         |
|------------|----------------------------------------------|-------|-------|---------------------------------------------------------------------------------------------------------------------------------------------------------------------------------------------------------------------------------------------------------------------------------------------------------------------------------------------------------------------------------------------------------------------------------------------------------------------------------------------------------------------------------------------------------------------------------------------------------------------------------------------------------------------------------------------------------------------------------------------------------------------------------------------------------------------------------------------------------------------------------------------------------|
| GO:0009987 | cellular process                             | 1.29  | 0.001 | ube2r2;ell2;rab33a;rabif;idh3b;reps1;iars1;rngtt;apcdd1l;fkbp11;oxtr;prkag1;stx18;cass4;stx16;gla;olfml3;hadhb;rab22a;myh7ba;kbtd8;clu;rwdd1;edem1;fmr1;eogt;otop1;rrp9;hdac3;cplane2;nudt2;sla2;rft1;ptprk;kpna5;srgap3;tespa1;lyar;prph;ndrg3a;timm8a;rpl36a;rplp0;ddit3;brk1;btkt;thumpd3;pcsk1;gnl3l;atxn7;cdk4;fancd2;cdk2;mon1a;pfdn5;pdrgr1;h6pd;rpn1;cav3;smyd5;id1;cidec;sp7;ptpra;parp3;thoc7;fbln2;myorg;espl1;rps26;ruvbl1;cnr1;bpnt1;uroc1;b9d2;rad18;hace1;ptpdc1;dnah1;mcrs1;mettl1;mtif3;slc4a8;traip;cnot10;tarbp2;ubap1;rbm5;grm6b;nudt14;phf2;tsfm;cxxc1b;dcn2;cse1l;esy1b;alas1;gli1;slc35a1;ppp4r1;adamts9;hmces;med12;smug1;cdh4;poc1a;aggf1;scg5;mmp19;strip1;nckap1l;rpl29;cers5;mars2;mars1;eefsec;usp4;os9;crbn;col7a1;camkv;kn1l;aldh1l1;timeless;src;suc1g2;scara3;rae1;extl3;nop56;slc4a11;trpc4apa;sta1;rars2;emc3;celf4;vhl;smarcd1;bcdin3d;psmd6;suox;mapkapk3;il1rapl2 |
| GO:0044238 | primary metabolic process                    | 1.82  | 0.000 | myorg;ube2r2;espl1;ell2;rps26;ruvbl1;cnr1;bpnt1;uroc1;rad18;idh3b;iars1;rngtt;hace1;prkag1;mettl1;mtif3;gla;traip;cnot10;tarbp2;hadhb;kbtd8;ubap1;rbm5;nudt14;phf2;tsfm;rwdd1;cxxc1b;edem1;fmr1;ctsz;eogt;rrp9;hdac3;alas1;nudt2;ppp4r1;adamts9;dcaf12;hmces;smug1;rft1;ptprk;mmp19;lyar;rpl29;mst1;cers5;mars2;mars1;eefsec;rpl36a;usp4;os9;crbn;rplp0;btkt;camkv;thumpd3;tpgs2;timeless;pcsk1;gnl3l;cdk4;src;fancd2;cdk2;suc1g2;apof;extl3;h6pd;rpn1;trpc4apa;rars2;celf4;vhl;ptpra;parp3;thoc7;npepl1;bcdin3d;psmd6;mapkapk3                                                                                                                                                                                                                                                                                                                                                                         |
| GO:0006725 | cellular aromatic compound metabolic process | 2.35  | 0.001 | ell2;smug1;ruvbl1;rad18;lyar;iars1;mars2;rngtt;mars1;mettl1;traip;cnot10;thumpd3;aldh1l1;timeless;tarbp2;gnl3l;fancd2;suc1g2;rbm5;nudt14;h6pd;cxxc1b;fmr1;rars2;celf4;vhl;parp3;thoc7;rrp9;bcdin3d;alas1;nudt2                                                                                                                                                                                                                                                                                                                                                                                                                                                                                                                                                                                                                                                                                          |
| GO:0034641 | cellular nitrogen compound metabolic process | 2.57  | 0.000 | ell2;rps26;smug1;ruvbl1;uroc1;rad18;lyar;iars1;rpl29;cers5;mars2;rngtt;mars1;eefsec;rpl36a;rplp0;mettl1;mtif3;gla;traip;cnot10;thumpd3;aldh1l1;timeless;pcsk1;tarbp2;gnl3l;fancd2;suc1g2;rbm5;nudt14;tsfm;rwdd1;h6pd;cxxc1b;fmr1;rars2;celf4;vhl;parp3;thoc7;rrp9;bcdin3d;alas1;nudt2                                                                                                                                                                                                                                                                                                                                                                                                                                                                                                                                                                                                                   |
| GO:0006807 | nitrogen compound metabolic process          | 1.89  | 0.000 | ube2r2;espl1;ell2;rps26;ruvbl1;cnr1;uroc1;rad18;iars1;rngtt;hace1;prkag1;mettl1;mtif3;gla;traip;cnot10;tarbp2;kbtd8;ubap1;rbm5;nudt14;phf2;tsfm;rwdd1;cxxc1b;edem1;fmr1;ctsz;eogt;rrp9;hdac3;alas1;nudt2;ppp4r1;adamts9;dcaf12;hmces;smug1;rft1;ptprk;mmp19;lyar;rpl29;mst1;cers5;mars2;mars1;eefsec;rpl36a;usp4;os9;crbn;rplp0;btkt;camkv;thumpd3;tpgs2;aldh1l1;timeless;pcsk1;gnl3l;cdk4;src;fancd2;cdk2;suc1g2;extl3;h6pd;rpn1;trpc4apa;rars2;celf4;vhl;ptpra;parp3;thoc7;npepl1;bcdin3d;psmd6;mapkapk3                                                                                                                                                                                                                                                                                                                                                                                              |
| GO:1901564 | organonitrogen compound metabolic process    | 1.89  | 0.000 | ube2r2;espl1;rps26;ruvbl1;cnr1;uroc1;rad18;iars1;hace1;prkag1;mtif3;gla;traip;kbtd8;ubap1;phf2;tsfm;rwdd1;cxxc1b;edem1;ctsz;eogt;hdac3;alas1;nudt2;ppp4r1;adamts9;dcaf12;hmces;rft1;ptprk;mmp19;rpl29;mst1;cers5;mars2;mars1;eefsec;rpl36a;usp4;os9;crbn;rplp0;btkt;camkv;tpgs2;aldh1l1;pcsk1;cdk4;src;cdk2;suc1g2;extl3;h6pd;rpn1;trpc4apa;rars2;vhl;ptpra;parp3;npepl1;psmd6;mapkapk3                                                                                                                                                                                                                                                                                                                                                                                                                                                                                                                 |
| GO:0043603 | cellular amide metabolic process             | 4.16  | 0.000 | rps26;uroc1;suc1g2;iars1;rpl29;tsfm;cers5;mars2;mars1;rwdd1;eefsec;rpl36a;rplp0;rars2;mtif3;gla;pcsk1                                                                                                                                                                                                                                                                                                                                                                                                                                                                                                                                                                                                                                                                                                                                                                                                   |
| GO:0006099 | tricarboxylic acid cycle                     | 16.40 | 0.048 | suc1g2;idh3b                                                                                                                                                                                                                                                                                                                                                                                                                                                                                                                                                                                                                                                                                                                                                                                                                                                                                            |
| GO:0006412 | translation                                  | 5.11  | 0.003 | tsfm;mars2;mars1;rwdd1;rps26;eefsec;rpl36a;rplp0;rars2;mtif3;iars1;rpl29                                                                                                                                                                                                                                                                                                                                                                                                                                                                                                                                                                                                                                                                                                                                                                                                                                |

|            |                                             |                 |       |                                                                                                                                                                                                                                                                                                                                                                                                                                                           |
|------------|---------------------------------------------|-----------------|-------|-----------------------------------------------------------------------------------------------------------------------------------------------------------------------------------------------------------------------------------------------------------------------------------------------------------------------------------------------------------------------------------------------------------------------------------------------------------|
| GO:0010467 | gene expression                             | 2.48            | 0.008 | ell2;rps26;lyar;iars1;rpl29;mars2;rngtt;mars1;eefsec;rpl36a;rplp0;mettl1;mtif3;thumpd3;pcsk1;tarbp2;gnl3l;rbm5;rae1;tsfm;rwdd1;fmr1;rars2;celf4;thoc7;rrp9                                                                                                                                                                                                                                                                                                |
| GO:0043170 | macromolecule metabolic process             | 1.90            | 0.000 | ube2r2;espl1;ell2;rps26;ruvbl1;rad18;iars1;rngtt;hace1;prkag1;mettl1;mtif3;traip;cnot10;tarbp2;kbtd8;ubap1;rbm5;phf2;tsfm;rwdd1;cxxc1b;edem1;fmr1;ctsz;eogt;rrp9;hdac3;alas1;ppp4r1;adamts9;dcaf12;hmces;smug1;rft1;ptprk;mmp19;lyar;rpl29;mst1;mars2;mars1;eefsec;rpl36a;usp4;os9;crbn;rplp0;btik;camkv;thumpd3;tpgs2;timeless;pcsk1;gnl3l;cdk4;src;fancd2;cdk2;rae1;extl3;rpn1;trpc4apa;rars2;celf4;vhl;ptpra;parp3;thoc7;npepl1;bcdin3d;psmd6;mapkapk3 |
| GO:0034645 | cellular macromolecule biosynthetic process | 3.49            | 0.003 | rps26;rft1;iars1;rpl29;extl3;tsfm;mars2;mars1;rwdd1;eefsec;rpl36a;rpn1;rplp0;rars2;eogt;mtif3;alas1                                                                                                                                                                                                                                                                                                                                                       |
| GO:0044260 | cellular macromolecule metabolic process    | 2.76            | 0.000 | ube2r2;rps26;smug1;rft1;ruvbl1;rad18;iars1;rpl29;mars2;mars1;hace1;eefsec;rpl36a;usp4;os9;crbn;rplp0;mettl1;mtif3;traip;cnot10;thumpd3;timeless;fancd2;ubap1;extl3;tsfm;rwdd1;cxxc1b;edem1;rpn1;trpc4apa;rars2;eogt;vhl;parp3;bcdin3d;psmd6;alas1                                                                                                                                                                                                         |
| GO:0009059 | macromolecule biosynthetic process          | 2.75            | 0.027 | ell2;rps26;rft1;iars1;rpl29;extl3;tsfm;mars2;mars1;rwdd1;eefsec;rpl36a;rpn1;rplp0;rars2;eogt;mtif3;alas1                                                                                                                                                                                                                                                                                                                                                  |
| GO:0019538 | protein metabolic process                   | 1.96            | 0.000 | ube2r2;espl1;rps26;ruvbl1;rad18;iars1;hace1;prkag1;mtif3;traip;kbtd8;ubap1;phf2;tsfm;rwdd1;cxxc1b;edem1;ctsz;eogt;hdac3;alas1;ppp4r1;adamts9;dcaf12;hmces;rft1;ptprk;mmp19;rpl29;mst1;mars2;mars1;eefsec;rpl36a;usp4;os9;crbn;rplp0;btik;camkv;tpgs2;pcsk1;cdk4;src;cdk2;extl3;rpn1;trpc4apa;rars2;vhl;ptpra;parp3;npepl1;psmd6;mapkapk3                                                                                                                  |
| GO:0034660 | ncRNA metabolic process                     | 3.98            | 0.024 | mars2;tarbp2;gnl3l;mars1;ell2;rars2;mettl1;rrp9;lyar;bcdin3d;thumpd3;iars1                                                                                                                                                                                                                                                                                                                                                                                |
| GO:0090304 | nucleic acid metabolic process              | 2.48            | 0.006 | ell2;smug1;ruvbl1;rad18;lyar;iars1;mars2;rngtt;mars1;mettl1;traip;cnot10;thumpd3;timeless;tarbp2;gnl3l;fancd2;rbm5;cxxc1b;fmr1;rars2;celf4;vhl;parp3;thoc7;rrp9;bcdin3d                                                                                                                                                                                                                                                                                   |
| GO:0048513 | animal organ development                    | 1.93            | 0.025 | adamts9;myorg;med12;cdh4;ruvbl1;cnr1;irf6;aggf1;mst1;hace1;apcdd1;oxtr;mcrs1;crbn;stx16;brk1;barx1;aldh1l1;atxn7;src;kbtd8;extl3;nop56;cxxc1b;cav3;fmr1;dcn2;rars2;emc3;smyd5;otop1;vhl;sp7;ptpra;sma rcd1;psmd6;hdac3;alas1;gli1                                                                                                                                                                                                                         |
| A-C        |                                             |                 |       |                                                                                                                                                                                                                                                                                                                                                                                                                                                           |
| Go term    | GO name                                     | fold enrichment | fdr   |                                                                                                                                                                                                                                                                                                                                                                                                                                                           |
| GO:0001894 | tissue homeostasis                          | 17.26           | 0.046 | tert; nkiras1;                                                                                                                                                                                                                                                                                                                                                                                                                                            |

|                |                                                                         |                        |            |                                                                                                                                                                                                                                                                                                                                                                   |
|----------------|-------------------------------------------------------------------------|------------------------|------------|-------------------------------------------------------------------------------------------------------------------------------------------------------------------------------------------------------------------------------------------------------------------------------------------------------------------------------------------------------------------|
| GO:0090304     | nucleic acid metabolic process                                          | 3.08                   | 0.047      | ercc1;tert;mcm2;uhrf1;xrcc5;txnl4a;srfbp1;nsun2;trit1;sf3a3;tent4a;ccdc124;top2b;nr1i2;trim71;cpsf1;smg9;years1                                                                                                                                                                                                                                                   |
| GO:0034641     | cellular nitrogen compound metabolic process                            | 2.75                   | 0.009      | rps27a;ercc1;tert;gsr;mcm2;xrcc5;st3gal1;nsun2;tent4a;ccdc124;top2b;nr1i2;trim71;cpsf1;eif3i;mrps18b;years1;rpe;rpl15;uhrf1;rpl14;txnl4a;srfbp1;trit1;sf3a3;psenen;smg9                                                                                                                                                                                           |
| GO:0044260     | cellular macromolecule metabolic process                                | 2.83                   | 0.037      | rps27a;ercc1;rbbp5;tert;has1;mcm2;rpl15;uhrf1;rpl14;xrcc5;st3gal1;nsun2;pigu;top2b;psmf1;trim71;ngly1;prmt2;eif3i;smg9;mrps18b;years1                                                                                                                                                                                                                             |
| <b>B-C</b>     |                                                                         |                        |            |                                                                                                                                                                                                                                                                                                                                                                   |
| <b>Go term</b> | <b>GO name</b>                                                          | <b>fold enrichment</b> | <b>fdr</b> | <b>genes</b>                                                                                                                                                                                                                                                                                                                                                      |
| GO:0070920     | regulation of production of small RNA involved in gene silencing by RNA | 101.46                 | 0.018      | tarbp2;prkra;bcdin3d                                                                                                                                                                                                                                                                                                                                              |
| GO:0048705     | skeletal system morphogenesis                                           | 6.41                   | 0.011      | bcl9;med12;irf6;sp7;hoxd9;hoxd4;hoxd3;nkx3-2;aldh111;chrna1                                                                                                                                                                                                                                                                                                       |
| GO:0001501     | skeletal system development                                             | 4.34                   | 0.022      | bcl9;med12;src;fmr1;irf6;sp7;hoxd9;hoxd4;hoxd3;nkx3-2;aldh111;chrna1                                                                                                                                                                                                                                                                                              |
| GO:0032502     | developmental process                                                   | 1.71                   | 0.017      | myorg;rab33a;ruvbl1;evx2;mfap2;chn1;b9d2;tspo;agr2;hoxd9;hoxd4;hoxd3;nkx3-2;apcdd11;top2b;oxtr;aplp1;celsr2;dstyk;nudc;fmr1;dctn2;hdac3;alas1;gli1;med12;nphs1;vwa1;irf6;nbl1;aggf1;col22a1;chaf1b;nckap11;chrna1;rpl36a;usp4;nr1i2;crbn;rplp0;brk1;ltk;capzb;bzw2;ilf2;hoxd10;aldh111;hoxd11;bcl9;src;bap1;cav3;hsrb6;stau1;emc3;smyd5;vhl;sp7;parp3;smarcd1;sp9 |
| GO:0048513     | animal organ development                                                | 2.13                   | 0.008      | myorg;med12;ruvbl1;evx2;mfap2;nphs1;vwa1;irf6;tspo;nbl1;aggf1;hoxd9;col22a1;hoxd4;hoxd3;chaf1b;nkx3-2;chrna1;apcdd11;top2b;oxtr;crbn;brk1;celsr2;capzb;ilf2;aldh111;dstyk;bcl9;src;nudc;cav3;fmr1;hsrb6;dctn2;emc3;smyd5;vhl;sp7;smarcd1;hdac3;alas1;gli1                                                                                                         |
| GO:0009790     | embryo development                                                      | 3.01                   | 0.003      | med12;mfap2;irf6;tspo;nbl1;aggf1;hoxd9;col22a1;hoxd4;hoxd3;chaf1b;nkx3-2;rpl36a;crbn;rplp0;celsr2;aldh111;dstyk;bcl9;cav3;fmr1;dctn2;smyd5;smarcd1;sp9;gli1                                                                                                                                                                                                       |
| GO:0048568     | embryonic organ development                                             | 3.69                   | 0.013      | dstyk;bcl9;med12;mfap2;irf6;tspo;nbl1;aggf1;hoxd9;hoxd4;hoxd3;chaf1b;nkx3-2;crbn;cav3;smyd5;aldh111                                                                                                                                                                                                                                                               |
| GO:0006412     | translation                                                             | 4.68                   | 0.023      | mars2;mars1;rps26;eefsec;mrpl20;rpl36a;rplp0;eif4enif1;mrps18b;iars1;rpl29                                                                                                                                                                                                                                                                                        |

|            |                                                    |      |       |                                                                                                                                                                                                                                                                      |
|------------|----------------------------------------------------|------|-------|----------------------------------------------------------------------------------------------------------------------------------------------------------------------------------------------------------------------------------------------------------------------|
| GO:0043603 | cellular amide<br>metabolic process                | 3.50 | 0.020 | rps26;mrpl20;uroc1;gsr;eif4enif1;iars1;rpl29;cers5;mars2;mars1;eefsec;rpl36a;rplp0;psenen;gla;mrps18b                                                                                                                                                                |
| GO:0034641 | cellular nitrogen<br>compound<br>metabolic process | 2.30 | 0.004 | rps26;ruvbl1;uroc1;prkra;gsr;rad18;hoxd9;iars1;rpl29;cers5;mars2;mars1;eefsec;top2b;ccdc36;rpl36a;nr1i2;rplp0;hnrnpa3;gla;thumpd3;mrps18b;aldh1l1;bysl;trub2;tarbp2;mrpl20;fancd2;eif4enif1;rbm5;h6pd;mcm7;fmr1;psenen;smg9;ssu72;celf4;vhl;parp3;rrp9;bcdin3d;alas1 |
| GO:0010467 | gene expression                                    | 2.39 | 0.035 | rps26;prkra;hoxd9;iars1;rpl29;mars2;mars1;eefsec;rpl36a;nr1i2;rplp0;hnrnpa3;thumpd3;mrps18b;bysl;trub2;tarbp2;mrpl20;zc3h11a;eif4enif1;rbm5;fmr1;ssu72;celf4;rrp9                                                                                                    |
| GO:0044260 | cellular<br>macromolecule<br>metabolic process     | 2.21 | 0.020 | rps26;rft1;ruvbl1;rad18;iars1;rpl29;mars2;mars1;eefsec;top2b;ccdc36;rpl36a;usp4;os9;crbn;rplp0;ngly1;thumpd3;mrps18b;mrpl20;fancd2;has1;eif4enif1;bap1;usp49;mcm7;edem1;smg9;vhl;parp3;bcdin3d;alas1                                                                 |
| GO:0090304 | nucleic acid<br>metabolic process                  | 2.39 | 0.027 | ruvbl1;prkra;rad18;hoxd9;iars1;mars2;mars1;top2b;ccdc36;nr1i2;hnrnpa3;thumpd3;bysl;trub2;tarbp2;fancd2;rbm5;mcm7;fmr1;smg9;ssu72;celf4;vhl;parp3;rrp9;bcdin3d                                                                                                        |
